# Supplementary material for: Complementary PTM Profiling of Drug Response in Human Gastric Carcinoma by Immunoaffinity and IMAC Methods with Total Proteome Analysis
Source: MDPI journal article supplement (doi:10.3390/proteomes3030160), 2015-08-07
Supplement: s1 [file s1]

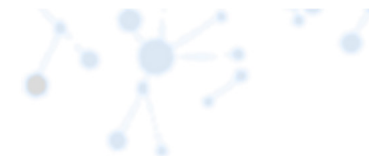

Analysis Name: SU11274  
Analysis Creation Date: 2015-03-11  
Build version: 329271M  
Content version: 21901358 (Release Date: 2014-12-09)

### Analysis settings

[View](#)

Reference set: Ingenuity Knowledge Base (Genes + Endogenous Chemicals)

Relationship to include: Direct

Does not Include Endogenous Chemicals

Optional Analyses: My Pathways My List

Filter Summary:

Consider only relationships where

confidence = Experimentally Observed OR High (predicted)

Cutoff:

Other = 0.990

## Top Canonical Pathways

| Name                                         | p-value  | Ratio             |
|----------------------------------------------|----------|-------------------|
| Actin Cytoskeleton Signaling                 | 1.57E-26 | 71/221<br>(0.321) |
| Sertoli Cell-Sertoli Cell Junction Signaling | 4.19E-25 | 63/186<br>(0.339) |
| Germ Cell-Sertoli Cell Junction Signaling    | 1.82E-24 | 58/163<br>(0.356) |
| Integrin Signaling                           | 1.93E-24 | 65/202<br>(0.322) |
| Epithelial Adherens Junction Signaling       | 5.88E-21 | 51/148<br>(0.345) |

## Top Upstream Regulators

| Upstream Regulator | p-value of overlap | Predicted Activation State |
|--------------------|--------------------|----------------------------|
| TP53               | 7.77E-36           | Inhibited                  |
| FOS                | 6.53E-12           |                            |
| HNF4A              | 1.77E-11           |                            |
| MYCN               | 1.81E-11           |                            |
| MYC                | 4.68E-11           |                            |

## Top Diseases and Bio Functions

### Diseases and Disorders

| Name                                | p-value             | # Molecules |
|-------------------------------------|---------------------|-------------|
| Cancer                              | 1.23E-75 - 2.32E-07 | 1504        |
| Gastrointestinal Disease            | 2.38E-56 - 1.66E-07 | 1111        |
| Hepatic System Disease              | 4.63E-37 - 1.03E-36 | 715         |
| Organismal Injury and Abnormalities | 3.35E-36 - 2.26E-07 | 887         |
| Infectious Disease                  | 1.11E-28 - 8.39E-09 | 318         |

### Molecular and Cellular Functions

| Name                               | p-value             | # Molecules |
|------------------------------------|---------------------|-------------|
| Cellular Assembly and Organization | 1.28E-62 - 2.15E-07 | 511         |
| Cellular Function and Maintenance  | 1.28E-62 - 2.15E-07 | 623         |
| Cellular Growth and Proliferation  | 6.19E-47 - 2.23E-07 | 727         |
| Cellular Movement                  | 5.20E-44 - 1.33E-07 | 488         |
| Cell Morphology                    | 8.02E-39 - 1.07E-07 | 526         |

### Physiological System Development and Function

| Name                                       | p-value             | # Molecules |
|--------------------------------------------|---------------------|-------------|
| Organismal Survival                        | 4.30E-26 - 4.88E-08 | 439         |
| Nervous System Development and Function    | 3.32E-23 - 1.12E-07 | 333         |
| Tissue Development                         | 3.32E-23 - 1.49E-07 | 513         |
| Connective Tissue Development and Function | 5.09E-17 - 1.27E-07 | 218         |
| Organismal Development                     | 4.23E-16 - 2.18E-07 | 501         |

## Top Tox Functions

### Assays: Clinical Chemistry and Hematology

| Name                           | p-value             | # Molecules |
|--------------------------------|---------------------|-------------|
| Increased Levels of Albumin    | 5.83E-03 - 6.44E-01 | 5           |
| Increased Levels of Hematocrit | 3.30E-02 - 3.30E-02 | 13          |
| Increased Levels of ALT        | 1.06E-01 - 1.06E-01 | 5           |
| Increased Levels of Creatinine | 1.07E-01 - 3.20E-01 | 8           |
| Increased Levels of AST        | 1.36E-01 - 4.71E-01 | 5           |

### Cardiotoxicity

| Name                        | p-value             | # Molecules |
|-----------------------------|---------------------|-------------|
| Cardiac Inflammation        | 2.24E-06 - 5.81E-01 | 14          |
| Cardiac Hypertrophy         | 5.75E-05 - 6.01E-01 | 55          |
| Cardiac Necrosis/Cell Death | 7.00E-05 - 4.87E-01 | 40          |
| Cardiac Fibrosis            | 4.74E-03 - 5.09E-01 | 27          |
| Cardiac Proliferation       | 5.44E-03 - 2.91E-01 | 16          |

### Hepatotoxicity

| Name                                 | p-value             | # Molecules |
|--------------------------------------|---------------------|-------------|
| Liver Hyperplasia/Hyperproliferation | 4.63E-37 - 5.79E-01 | 715         |
| Liver Necrosis/Cell Death            | 1.94E-06 - 2.72E-01 | 53          |
| Liver Hypoplasia                     | 2.07E-05 - 2.07E-05 | 13          |
| Liver Proliferation                  | 1.67E-04 - 1.47E-01 | 37          |
| Hepatocellular Carcinoma             | 1.71E-04 - 3.28E-01 | 81          |

### Nephrotoxicity

| Name                      | p-value             | # Molecules |
|---------------------------|---------------------|-------------|
| Renal Necrosis/Cell Death | 3.44E-09 - 5.09E-01 | 80          |
| Renal Proliferation       | 1.04E-04 - 4.27E-01 | 39          |
| Glomerular Injury         | 3.79E-04 - 6.44E-01 | 23          |
| Renal Inflammation        | 8.87E-04 - 4.71E-01 | 33          |
| Renal Nephritis           | 8.87E-04 - 4.71E-01 | 33          |

### Top Regulator Effect Networks

| ID | Regulators                  | Diseases & Functions                                        | Consistency Score |
|----|-----------------------------|-------------------------------------------------------------|-------------------|
| 1  | DDX17                       | apoptosis of fibroblast cell lines (+12 more)               | 21.500            |
| 2  | FOXC2                       | colony formation of cells, Growth Failure (+4 more)         | 7.348             |
| 3  | GMNN                        | branching of cells, cell survival (+8 more)                 | 7.000             |
| 4  | HIPK2                       | development of neurons, formation of lamellipodia (+4 more) | 5.669             |
| 5  | HIPK2, NFYA, SATB1, SMARCB1 | colon tumor, congenital heart disease (+5 more)             | 5.425             |

### Top Networks

| ID | Associated Network Functions                                                                                 | Score |
|----|--------------------------------------------------------------------------------------------------------------|-------|
| 1  | Cell Death and Survival, Cellular Assembly and Organization, Developmental Disorder                          | 43    |
| 2  | Cellular Function and Maintenance, Skeletal and Muscular System Development and Function, Tissue Development | 43    |
| 3  | Cellular Assembly and Organization, Cellular Function and Maintenance, Lipid Metabolism                      | 40    |
| 4  | Cancer, Cell Cycle, Cellular Assembly and Organization                                                       | 40    |
| 5  | RNA Post-Transcriptional Modification, RNA Damage and Repair, Molecular Transport                            | 40    |

### Top Tox Lists

| Name                                                                       | p-value  | Ratio             |
|----------------------------------------------------------------------------|----------|-------------------|
| Renal Necrosis/Cell Death                                                  | 8.61E-11 | 79/483<br>(0.164) |
| Mechanism of Gene Regulation by Peroxisome Proliferators via PPAR $\alpha$ | 1.32E-09 | 27/95 (0.284)     |
| PPAR $\alpha$ /RXR $\alpha$ Activation                                     | 3.64E-09 | 39/183<br>(0.213) |
| Liver Necrosis/Cell Death                                                  | 2.1E-08  | 49/275<br>(0.178) |
| TGF- $\beta$ Signaling                                                     | 3.11E-06 | 21/90 (0.233)     |

Top My Lists

| Name | p-value | Ratio |
|------|---------|-------|
|------|---------|-------|

Top My Pathways

| Name | p-value | Ratio |
|------|---------|-------|
|------|---------|-------|

Top Molecules

Other up-regulated

| Molecules               | Exp. Value | Exp. Chart                                                                            |
|-------------------------|------------|---------------------------------------------------------------------------------------|
| <a href="#">ABCA2</a>   | ↑2.000     |    |
| <a href="#">ADAM17</a>  | ↑2.000     |    |
| <a href="#">ADSL</a>    | ↑2.000     |   |
| <a href="#">AFTPH</a>   | ↑2.000     |  |
| <a href="#">AKAP17A</a> | ↑2.000     |  |
| <a href="#">ALG3</a>    | ↑2.000     |  |
| <a href="#">ANO6</a>    | ↑2.000     |  |
| <a href="#">ARID3A</a>  | ↑2.000     |  |

|          |        |                                                                                     |
|----------|--------|-------------------------------------------------------------------------------------|
| ATL2     | ↑2.000 |  |
| ATP6V1E1 | ↑2.000 |  |

Other down-regulated

| Molecules | Exp. Value | Exp. Chart                                                                            |
|-----------|------------|---------------------------------------------------------------------------------------|
| ZZEF1     | ↓-2.000    |    |
| ZYX       | ↓-2.000    |    |
| ZNRF2     | ↓-2.000    |    |
| ZNF706    | ↓-2.000    |    |
| ZNF622    | ↓-2.000    |    |
| ZNF609    | ↓-2.000    |    |
| ZNF598*   | ↓-2.000    |    |
| ZNF395    | ↓-2.000    |   |
| ZNF318    | ↓-2.000    |  |
| ZNF185*   | ↓-2.000    |  |
