# Supplementary material for: Complementary PTM Profiling of Drug Response in Human Gastric Carcinoma by Immunoaffinity and IMAC Methods with Total Proteome Analysis
Source: MDPI journal article supplement (doi:10.3390/proteomes3030160), 2015-08-07
Supplement: s1 [file s1]

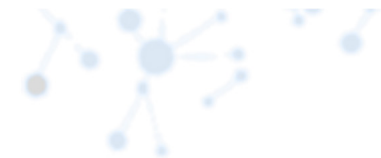

Analysis Name: Stauro

Analysis Creation Date: 2015-03-11

Build version: 329271M

Content version: 21901358 (Release Date: 2014-12-09)

### Analysis settings

[View](#)

Reference set: Ingenuity Knowledge Base (Genes + Endogenous Chemicals)

Relationship to include: Direct

Does not Include Endogenous Chemicals

Optional Analyses: My Pathways My List

Filter Summary:

Consider only relationships where

confidence = Experimentally Observed OR High (predicted)

Cutoff:

Other = 0.990

## Top Canonical Pathways

| Name                                         | p-value  | Ratio             |
|----------------------------------------------|----------|-------------------|
| Integrin Signaling                           | 4.77E-17 | 56/202<br>(0.277) |
| RhoA Signaling                               | 1.54E-16 | 42/124<br>(0.339) |
| Signaling by Rho Family GTPases              | 3.17E-16 | 60/236<br>(0.254) |
| ERK/MAPK Signaling                           | 1.43E-15 | 52/191<br>(0.272) |
| Sertoli Cell-Sertoli Cell Junction Signaling | 1.95E-15 | 51/186<br>(0.274) |

## Top Upstream Regulators

| Upstream Regulator | p-value of overlap | Predicted Activation State |
|--------------------|--------------------|----------------------------|
| TP53               | 1.16E-31           | Inhibited                  |
| MYCN               | 1.34E-16           |                            |
| MYC                | 5.19E-15           |                            |
| HNF4A              | 2.70E-14           |                            |
| NUPR1              | 4.81E-13           |                            |

## Top Diseases and Bio Functions

### Diseases and Disorders

| Name                                | p-value             | # Molecules |
|-------------------------------------|---------------------|-------------|
| Cancer                              | 3.56E-84 - 1.24E-06 | 1578        |
| Gastrointestinal Disease            | 2.62E-72 - 3.21E-07 | 1192        |
| Hepatic System Disease              | 1.29E-51 - 2.77E-51 | 785         |
| Organismal Injury and Abnormalities | 7.39E-37 - 1.24E-06 | 939         |
| Reproductive System Disease         | 4.06E-26 - 1.24E-06 | 786         |

### Molecular and Cellular Functions

| Name                               | p-value             | # Molecules |
|------------------------------------|---------------------|-------------|
| Cellular Assembly and Organization | 5.17E-47 - 1.20E-06 | 489         |
| Cellular Function and Maintenance  | 5.17E-47 - 4.88E-07 | 580         |
| Cellular Growth and Proliferation  | 3.02E-45 - 8.62E-07 | 745         |
| Cell Cycle                         | 2.83E-35 - 1.08E-06 | 384         |
| Gene Expression                    | 6.40E-34 - 7.78E-07 | 463         |

### Physiological System Development and Function

| Name                                       | p-value             | # Molecules |
|--------------------------------------------|---------------------|-------------|
| Organismal Survival                        | 7.88E-26 - 7.88E-26 | 457         |
| Tissue Development                         | 1.98E-20 - 9.98E-07 | 497         |
| Embryonic Development                      | 4.28E-19 - 1.33E-06 | 347         |
| Connective Tissue Development and Function | 1.45E-18 - 7.09E-07 | 229         |
| Tissue Morphology                          | 1.51E-15 - 1.33E-06 | 349         |

## Top Tox Functions

### Assays: Clinical Chemistry and Hematology

| Name                                     | p-value             | # Molecules |
|------------------------------------------|---------------------|-------------|
| Increased Levels of Hematocrit           | 4.39E-02 - 4.39E-02 | 13          |
| Decreased Levels of Potassium            | 7.97E-02 - 2.83E-01 | 2           |
| Increased Levels of Albumin              | 7.97E-02 - 5.26E-01 | 3           |
| Increased Levels of Alkaline Phosphatase | 1.53E-01 - 5.37E-01 | 8           |
| Increased Levels of Red Blood Cells      | 1.80E-01 - 1.80E-01 | 11          |

### Cardiotoxicity

| Name                        | p-value             | # Molecules |
|-----------------------------|---------------------|-------------|
| Cardiac Necrosis/Cell Death | 8.60E-07 - 2.85E-01 | 48          |
| Cardiac Hypertrophy         | 1.12E-06 - 4.95E-01 | 59          |
| Cardiac Proliferation       | 3.72E-05 - 3.08E-01 | 21          |
| Cardiac Fibrosis            | 2.14E-03 - 5.33E-01 | 29          |
| Cardiac Dilation            | 9.45E-03 - 2.20E-01 | 14          |

### Hepatotoxicity

| Name                                 | p-value             | # Molecules |
|--------------------------------------|---------------------|-------------|
| Liver Hyperplasia/Hyperproliferation | 1.29E-51 - 4.41E-01 | 785         |
| Liver Necrosis/Cell Death            | 1.36E-06 - 3.97E-01 | 54          |
| Hepatocellular Carcinoma             | 3.60E-06 - 2.20E-01 | 90          |
| Liver Proliferation                  | 1.41E-04 - 2.20E-01 | 35          |
| Liver Hypoplasia                     | 1.51E-04 - 1.51E-04 | 12          |

### Nephrotoxicity

| Name                      | p-value             | # Molecules |
|---------------------------|---------------------|-------------|
| Renal Proliferation       | 6.76E-11 - 5.72E-01 | 51          |
| Renal Necrosis/Cell Death | 1.86E-05 - 1.00E00  | 68          |
| Renal Inflammation        | 5.36E-03 - 5.00E-01 | 27          |
| Renal Nephritis           | 5.36E-03 - 5.00E-01 | 27          |
| Glomerular Injury         | 1.06E-02 - 3.92E-01 | 16          |

### Top Regulator Effect Networks

| ID | Regulators        | Diseases & Functions                         | Consistency Score |
|----|-------------------|----------------------------------------------|-------------------|
| 1  | ARNT, HSF1, MYOD1 | incidence of liver tumor (+2 more)           | 3.175             |
| 2  | E2F1, MYC, SP1    | progression of carcinoma, translation of RNA | 2.182             |
| 3  | E2F1              | osteosarcoma, progression of carcinoma       | 1.732             |
| 4  | TFAP4             | senescence of fibroblast cell lines          | 1.155             |
| 5  | MKL1              | apoptosis of neurons                         | 0.500             |

### Top Networks

| ID | Associated Network Functions                                                        | Score |
|----|-------------------------------------------------------------------------------------|-------|
| 1  | Cardiovascular Disease, Cell Death and Survival, Cellular Assembly and Organization | 42    |
| 2  | Auditory Disease, Developmental Disorder, Hereditary Disorder                       | 42    |
| 3  | Cancer, Gastrointestinal Disease, Cell Morphology                                   | 40    |
| 4  | Protein Synthesis, Gene Expression, RNA Post-Transcriptional Modification           | 40    |
| 5  | Cellular Assembly and Organization, Developmental Disorder, Hereditary Disorder     | 40    |

### Top Tox Lists

| Name                                                                       | p-value  | Ratio             |
|----------------------------------------------------------------------------|----------|-------------------|
| Mechanism of Gene Regulation by Peroxisome Proliferators via PPAR $\alpha$ | 6.69E-08 | 25/95 (0.263)     |
| Liver Necrosis/Cell Death                                                  | 2E-07    | 48/275<br>(0.175) |
| Cardiac Necrosis/Cell Death                                                | 1.16E-06 | 45/266<br>(0.169) |
| Renal Necrosis/Cell Death                                                  | 5.83E-06 | 67/483<br>(0.139) |
| Cardiac Hypertrophy                                                        | 1.13E-05 | 56/389<br>(0.144) |

Top My Lists

| Name | p-value | Ratio |
|------|---------|-------|
|------|---------|-------|

Top My Pathways

| Name | p-value | Ratio |
|------|---------|-------|
|------|---------|-------|

Top Molecules

Other up-regulated

| Molecules                                                  | Exp. Value | Exp. Chart                                                                            |
|------------------------------------------------------------|------------|---------------------------------------------------------------------------------------|
| 3,4-dihydro-5[4-(1-piperindinyl)butoxy]-1(2H)-isoquinoline | ↑2.000     |    |
| 5-methoxypsoralen                                          | ↑2.000     |    |
| ABCA2                                                      | ↑2.000     |   |
| ADAR                                                       | ↑2.000     |  |
| ADCY6                                                      | ↑2.000     |  |
| ADD3                                                       | ↑2.000     |  |
| ADSL                                                       | ↑2.000     |  |
| AFAP1L2                                                    | ↑2.000     |  |

|      |        |                                                                                     |
|------|--------|-------------------------------------------------------------------------------------|
| AFP  | ↑2.000 |  |
| AIM1 | ↑2.000 |  |

Other down-regulated

| Molecules | Exp. Value | Exp. Chart                                                                            |
|-----------|------------|---------------------------------------------------------------------------------------|
| ZXDC      | ↓-2.000    |    |
| ZNRF2     | ↓-2.000    |    |
| ZNF827    | ↓-2.000    |    |
| ZNF687    | ↓-2.000    |    |
| ZNF644    | ↓-2.000    |    |
| ZNF638*   | ↓-2.000    |    |
| ZNF609    | ↓-2.000    |    |
| ZNF318    | ↓-2.000    |   |
| ZMYND8*   | ↓-2.000    |  |
| ZMYM3*    | ↓-2.000    |  |
