# Supplementary material for: Complementary PTM Profiling of Drug Response in Human Gastric Carcinoma by Immunoaffinity and IMAC Methods with Total Proteome Analysis
Source: MDPI journal article supplement (doi:10.3390/proteomes3030160), 2015-08-07
Supplement: s1 [file s1]

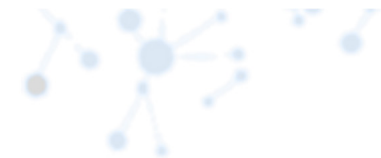

Analysis Name: SU11274

Analysis Creation Date: 2015-03-10

Build version: 329271M

Content version: 21901358 (Release Date: 2014-12-09)

### Analysis settings

#### [View](#)

Reference set: Ingenuity Knowledge Base (Genes + Endogenous Chemicals)

Relationship to include: Direct

Does not Include Endogenous Chemicals

Optional Analyses: My Pathways My List

Filter Summary:

Consider only relationships where

confidence = Experimentally Observed OR High (predicted)

Cutoff:

## Top Canonical Pathways

| Name                                         | p-value  | Ratio             |
|----------------------------------------------|----------|-------------------|
| Germ Cell-Sertoli Cell Junction Signaling    | 1.26E-24 | 92/163<br>(0.564) |
| Epithelial Adherens Junction Signaling       | 4.18E-22 | 83/148<br>(0.561) |
| EIF2 Signaling                               | 5.36E-22 | 97/188<br>(0.516) |
| Sertoli Cell-Sertoli Cell Junction Signaling | 3.64E-21 | 95/186<br>(0.511) |
| Molecular Mechanisms of Cancer               | 1E-20    | 153/373<br>(0.41) |

## Top Upstream Regulators

| Upstream Regulator | p-value of overlap | Predicted Activation State |
|--------------------|--------------------|----------------------------|
| TP53               | 9.45E-49           | Inhibited                  |
| HNF4A              | 1.03E-39           |                            |
| MYC                | 1.80E-28           |                            |
| MYCN               | 2.07E-26           |                            |
| E2F1               | 1.03E-23           |                            |

## Top Diseases and Bio Functions

### Diseases and Disorders

| Name                                | p-value              | # Molecules |
|-------------------------------------|----------------------|-------------|
| Cancer                              | 4.02E-157 - 2.85E-08 | 3850        |
| Gastrointestinal Disease            | 1.42E-119 - 1.52E-09 | 2791        |
| Hepatic System Disease              | 1.44E-75 - 4.06E-74  | 1768        |
| Organismal Injury and Abnormalities | 6.06E-55 - 2.24E-08  | 2231        |
| Infectious Disease                  | 6.51E-47 - 5.82E-14  | 733         |

### Molecular and Cellular Functions

| Name                               | p-value             | # Molecules |
|------------------------------------|---------------------|-------------|
| Gene Expression                    | 4.02E-77 - 4.21E-09 | 1118        |
| Cellular Growth and Proliferation  | 4.05E-70 - 2.38E-08 | 1688        |
| Cellular Assembly and Organization | 6.71E-62 - 3.01E-08 | 1080        |
| Cellular Function and Maintenance  | 6.71E-62 - 3.01E-08 | 1143        |
| Cell Death and Survival            | 7.28E-52 - 2.66E-08 | 1543        |

### Physiological System Development and Function

| Name                                       | p-value             | # Molecules |
|--------------------------------------------|---------------------|-------------|
| Organismal Survival                        | 7.03E-49 - 7.87E-09 | 1053        |
| Connective Tissue Development and Function | 1.10E-24 - 8.94E-09 | 473         |
| Embryonic Development                      | 2.70E-23 - 1.61E-08 | 723         |
| Tissue Development                         | 3.67E-21 - 1.61E-08 | 903         |
| Nervous System Development and Function    | 5.63E-19 - 1.61E-08 | 551         |

## Top Tox Functions

### Assays: Clinical Chemistry and Hematology

| Name                                     | p-value             | # Molecules |
|------------------------------------------|---------------------|-------------|
| Increased Levels of Albumin              | 4.03E-02 - 2.01E-01 | 3           |
| Increased Levels of AST                  | 1.07E-01 - 3.61E-01 | 10          |
| Decreased Levels of Potassium            | 2.01E-01 - 5.92E-01 | 2           |
| Increased Levels of Alkaline Phosphatase | 2.51E-01 - 4.90E-01 | 25          |
| Decreased Levels of Albumin              | 2.64E-01 - 3.61E-01 | 6           |

### Cardiotoxicity

| Name                        | p-value             | # Molecules |
|-----------------------------|---------------------|-------------|
| Cardiac Necrosis/Cell Death | 1.52E-05 - 5.92E-01 | 87          |
| Congenital Heart Anomaly    | 6.50E-05 - 5.49E-01 | 70          |
| Cardiac Hypertrophy         | 9.95E-05 - 5.02E-01 | 118         |
| Cardiac Inflammation        | 9.39E-04 - 3.47E-01 | 30          |
| Cardiac Hypoplasia          | 1.26E-02 - 2.01E-01 | 21          |

### Hepatotoxicity

| Name                                 | p-value             | # Molecules |
|--------------------------------------|---------------------|-------------|
| Liver Hyperplasia/Hyperproliferation | 1.44E-75 - 5.92E-01 | 1768        |
| Hepatocellular Carcinoma             | 1.02E-06 - 2.01E-01 | 193         |
| Liver Necrosis/Cell Death            | 1.87E-05 - 5.92E-01 | 101         |
| Liver Proliferation                  | 1.53E-04 - 4.90E-01 | 76          |
| Liver Hypoplasia                     | 5.87E-04 - 5.87E-04 | 19          |

### Nephrotoxicity

| Name                      | p-value             | # Molecules |
|---------------------------|---------------------|-------------|
| Renal Necrosis/Cell Death | 1.49E-10 - 1.00E00  | 166         |
| Renal Proliferation       | 2.56E-07 - 3.01E-01 | 86          |
| Renal Inflammation        | 8.74E-05 - 1.00E00  | 65          |
| Renal Nephritis           | 8.74E-05 - 1.00E00  | 65          |
| Renal Dysplasia           | 4.03E-02 - 3.26E-01 | 7           |

### Top Regulator Effect Networks

| ID | Regulators | Diseases & Functions                                  | Consistency Score |
|----|------------|-------------------------------------------------------|-------------------|
| 1  | GFI1       | autophagy, cell survival, colony formation (+10 more) | 16.667            |
| 2  | IRF4       | apoptosis of lung cancer cell lines (+11 more)        | 14.230            |
| 3  | GMNN       | apoptosis of fibroblast cell lines (+9 more)          | 7.071             |
| 4  | NFYA       | cell movement of breast cancer cell lines (+5 more)   | 6.667             |
| 5  | SMARCB1    | apoptosis of fibroblast cell lines (+7 more)          | 6.633             |

### Top Networks

| ID | Associated Network Functions                                                               | Score |
|----|--------------------------------------------------------------------------------------------|-------|
| 1  | Amino Acid Metabolism, Molecular Transport, Small Molecule Biochemistry                    | 28    |
| 2  | Cellular Assembly and Organization, Cell Cycle, DNA Replication, Recombination, and Repair | 28    |
| 3  | Infectious Disease, Protein Degradation, Protein Synthesis                                 | 28    |
| 4  | Cancer, Cell Cycle, Cell Death and Survival                                                | 28    |
| 5  | Cell Death and Survival, Cell-To-Cell Signaling and Interaction, Drug Metabolism           | 28    |

### Top Tox Lists

| Name                                                                       | p-value  | Ratio              |
|----------------------------------------------------------------------------|----------|--------------------|
| Renal Necrosis/Cell Death                                                  | 1.85E-13 | 165/483<br>(0.342) |
| Mechanism of Gene Regulation by Peroxisome Proliferators via PPAR $\alpha$ | 2.52E-08 | 43/95 (0.453)      |
| Liver Necrosis/Cell Death                                                  | 5.75E-08 | 93/275<br>(0.338)  |
| PPAR $\alpha$ /RXR $\alpha$ Activation                                     | 1.48E-07 | 67/183<br>(0.366)  |
| RAR Activation                                                             | 1.55E-07 | 65/176<br>(0.369)  |

Top My Lists

| Name | p-value | Ratio |
|------|---------|-------|
|------|---------|-------|

Top My Pathways

| Name | p-value | Ratio |
|------|---------|-------|
|------|---------|-------|

Top Molecules

Other up-regulated

| Molecules               | Exp. Value | Exp. Chart                                                                            |
|-------------------------|------------|---------------------------------------------------------------------------------------|
| <a href="#">ABCA2</a>   | ↑2.000     |    |
| <a href="#">ADAM17</a>  | ↑2.000     |    |
| <a href="#">ADSL</a>    | ↑2.000     |   |
| <a href="#">AFTPH</a>   | ↑2.000     |  |
| <a href="#">AKAP17A</a> | ↑2.000     |  |
| <a href="#">ALG3</a>    | ↑2.000     |  |
| <a href="#">ANO6</a>    | ↑2.000     |  |
| <a href="#">ARID3A</a>  | ↑2.000     |  |

|          |        |                                                                                     |
|----------|--------|-------------------------------------------------------------------------------------|
| ATL2     | ↑2.000 |  |
| ATP6V1E1 | ↑2.000 |  |

Other down-regulated

| Molecules | Exp. Value | Exp. Chart                                                                            |
|-----------|------------|---------------------------------------------------------------------------------------|
| ZZEF1     | ↓-2.000    |    |
| ZYX       | ↓-2.000    |    |
| ZNRF2     | ↓-2.000    |    |
| ZNF706    | ↓-2.000    |    |
| ZNF622    | ↓-2.000    |    |
| ZNF609    | ↓-2.000    |    |
| ZNF598*   | ↓-2.000    |    |
| ZNF395    | ↓-2.000    |  |
| ZNF318    | ↓-2.000    |  |
| ZNF185*   | ↓-2.000    |  |
